# Supplementary material for: Distribution of legacy and emerging per- and polyfluoroalkyl substances in riverine and coastal sediments of Southeastern North Carolina, USA
Source: Royal Society of Chemistry journal article supplement (doi:10.1039/d2em00246a), 2022-01-01

## Supporting Information

### Distribution of Legacy and Emerging Per- and Polyfluoroalkyl substances in Riverine and Coastal Sediments of SouthEast North Carolina, USA

Megumi Shimizu\*<sup>a</sup>, Rosa S. Garcia<sup>a</sup>, G. Brooks Avery<sup>a</sup>, Robert J. Kieber<sup>a</sup>, Stephen A. Skrabal<sup>a</sup> and Ralph N. Mead\*<sup>a,b</sup>

<sup>a</sup> Department of Chemistry and Biochemistry, University of North Carolina Wilmington, Wilmington, NC 28403 USA

<sup>b</sup> Earth and Ocean Sciences, University of North Carolina Wilmington, Wilmington, NC 28403 USA

## Table of Contents

|                                                                                                                                                                                                                       |   |
|-----------------------------------------------------------------------------------------------------------------------------------------------------------------------------------------------------------------------|---|
| PFAS Recovery.....                                                                                                                                                                                                    | 2 |
| Table S1. Sample locations and corresponding ancillary data.....                                                                                                                                                      | 3 |
| Table S2: The pH of the surface water at time of collection and the sediment % organic carbon content at each sample location.....                                                                                    | 4 |
| Table S3. The mobile phase gradient program for quantitative analysis.....                                                                                                                                            | 5 |
| Table S4. MS transitions, MRM parameters (CE: collision energy, DP: declustering potential, CXP: cell exit potential, EP: entrance potential), and internal standards for PFAS analysis.....                          | 5 |
| Table S5. Spiked recoveries of each target analyte and the corresponding LOQ and LODs for each compound. The average, standard deviation and percent relative standard deviation is shown below each analyte.....     | 6 |
| Table S6. The environmental concentrations obtained for precision performance. The average and standard deviations are listed below each set of samples (n=2-3). These averages were used as the reported values..... | 7 |
| Table S7: Suspect PFAS screened for in sediment extracts along Cape Fear River.....                                                                                                                                   | 8 |
| Figure S1. Chemical structures of each targeted PFAS for quantitative analysis. *Note PFMOPrA and PMPA could not be chromatographically resolved at the time of analysis.....                                         | 9 |

Figure S2: Structures of PFAS screened for in sediment extracts by LC-QTOF. The structures and CAS numbers are based upon previously published information and remain tentative as no authentic standard was available at the time of study.....10

### PFAS Recovery from Sediment

Recoveries were calculated based on a matrix-matched spike extraction from several sediment locations (Table S3). Roughly 10 g of sediment were added to three 50 mL tubes labeled matrix blank (BLK), matrix spike B (SB), and matrix spike A (SA). Before extraction, SB was spiked with a known concentration (0.0231-0.136 ng) of working standards (WS), PFMOAA, PFMOPrA, PFMOBA, HFPO-DA, PFOA and PFOS. After elution, a known concentration of internal surrogates (IS), M-PFBA, M-PFHxA, M-PFOA, M-PFOS and M-HFPO-DA, was added to SB, SA, and BLK. The same amount of WS was also added to SA eluate after elution. Recoveries were determined by subtracting the area ratio of BLK from SB and SA and then calculating the area ratio between SB and SA (see equation 1).

$$\text{Equation 1. } \text{Recovery} = \frac{SB - BLK}{SA - BLK}$$

Where

- SB = response for SPE extract of matrix spiked before SPE
- SA = response for SPE extract of matrix spiked after SPE
- BLK = response for SPE extract of matrix without spike

Table S1. Sample locations and date/time of collections of sediment used in this study.

| Sample Location      | Lat °N    | Long °W   | Sample Name                                          | Collection Date/ Time                                                                             |
|----------------------|-----------|-----------|------------------------------------------------------|---------------------------------------------------------------------------------------------------|
| Lock and Dam 1       | 34°24'16" | 78°17'37" | LD1_170919,<br>LD1_180130,<br>LD1_180326             | Sept 19, 2017 / 13:45<br>Jan 30, 2018 / 15:43<br>March 26, 2018 / 14:<br>22                       |
| Lock and Dam 2       | 34°37'35" | 78°34'39" | LD2_170919                                           | Sept 19, 2017 / 14:33                                                                             |
| William O' Huske Dam | 34°50'06" | 78°49'23" | WOD_171909<br>WOD_171102<br>WOD_180130<br>WOD_180326 | Sept 19, 2017 / 15:30<br>Nov 2, 2017 / 14:43<br>Jan 30, 2018 / 15:43<br>March 26, 2018 /<br>16:00 |
| Chemours Creek       | 34°50'20" | 78°49'30" | Chemours_18032<br>6                                  | March 26, 2018/<br>16:15                                                                          |
| Fayetteville         | 34°59'48" | 78°51'01" | FBR_170919<br>FBR_171102<br>FBR_180130<br>FBR_180326 | Sept 19, 2017 / 15:50<br>Nov 2, 2017 / 15:16<br>Jan 30, 2018 / 16:45<br>March 26, 2018 /<br>16:45 |
| Elizabethtown        | 34°37'52" | 78°36'17" | EB_180130<br>EB_180326                               | Jan 30, 2018 / 15:10<br>March 26, 2018 /<br>15:05                                                 |
| Horseshoe Bend       | 34°14'37" | 77°58'11" | HB_171023<br>HB_181029                               | Oct 23, 2017 / 12:00<br>Oct 29, 2018 / 12:05                                                      |
| CF Mile Marker 61    | 34°11'37" | 77°57'26" | M61_171023<br>M61_181029                             | Oct 23, 2017 / 11:00<br>Oct 29, 2018 / 11:20                                                      |
| CF Mile Marker 54    | 34°08'21" | 77°56'45" | M54_171023<br>M54_181029                             | Oct 23, 2017 / 10:25<br>Oct 29, 2018 / 10:30                                                      |
| CF Mile Marker 35    | 34°02'00" | 77°56'13" | M35_181029                                           | Oct 29, 2018 / 10:15                                                                              |
| CF Mile Marker 23    | 33°56'44" | 77°58'10" | M23_181029<br>M23_190917                             | Oct 29, 2018 / 09:30<br>Sept 17, 2019 / 09:45                                                     |
| CF Mile Marker 18    | 33°54'46" | 78°01'01" | M18_181029                                           | Oct 29, 2018 / 09:00                                                                              |
| Mouth of CF River    | 33°49'38" | 78°02'20" | MCF_181029<br>MCF_191008                             | Oct 29, 2018 / 11:00<br>Oct 8, 2019 / 10:10                                                       |
| Fort Sumter          | 32°45'47" | 79°52'47" | FS_191010                                            | Oct 10, 2019 / 14:20                                                                              |
| Beaufort             | 34°39'02" | 76°39'09" | BFT_190401                                           | April 1, 2019 / 15:35                                                                             |

Table S2. The pH of the surface water at time of collection and the sediment % organic carbon content at each sample location.

| Sample Location      | Sample Name     | pH  | %OC  |
|----------------------|-----------------|-----|------|
| Lock and Dam 1       | LD1_170919,     | na  | 0.4  |
|                      | LD1_180130,     | na  | 2.0  |
|                      | LD1_180326      | na  | 2.0  |
| Lock and Dam 2       | LD2_170919      | na  | 3.0  |
| William O' Huske Dam | WOD_171909      | na  | 0.2  |
|                      | WOD_171102      | na  | 0.1  |
|                      | WOD_180130      | na  | 0.1  |
|                      | WOD_180326      | na  | 0.1  |
| Chemours Creek       | Chemours_180326 | na  | 0.8  |
| Fayetteville         | FBR_170919      | na  | 0.8  |
|                      | FBR_171102      | na  | 0.6  |
|                      | FBR_180130      | na  | 2.6  |
|                      | FBR_180326      | na  | 1.0  |
| Elizabethtown        | EB_180130       | na  | 3.0  |
|                      | EB_180326       | na  | 3.0  |
| Horseshoe Bend       | HB_171023       | 7.4 | 0.3  |
|                      | HB_181029       | 6.9 | 3.0  |
| CF Mile Marker 61    | M61_171023      | 7.5 | 1.0  |
|                      | M61_181029      | 7.2 | 0.1  |
| CF Mile Marker 54    | M54_171023      | 7.5 | 3.0  |
|                      | M54_181029      | 7.4 | 0.04 |
| CF Mile Marker 35    | M35_181029      | 7.6 | 0.8  |
| CF Mile Marker 23    | M23_181029      | 7.8 | 0.7  |
|                      | M23_190917      | 7.9 | ---  |
| CF Mile Marker 18    | M18_181029      | 7.9 | 3.0  |
| Mouth of CF River    | MCF_181029      | 7.9 | 0.8  |
|                      | MCF_191008      | 8.1 | ---- |
| Fort Sumter          | FS_191010       | na  | 0.9  |
| Beaufort             | BFT_190401      | na  | 0.7  |

na= not analyzed

Table S3. The mobile phase gradient program for quantitative analysis.

| Time (min) | A (%) | B (%) | Flow rate (mL/min) |
|------------|-------|-------|--------------------|
| 0          | 95    | 5     | 0.4                |
| 0.1        | 45    | 55    | 0.4                |
| 4.5        | 1     | 99    | 0.4                |
| 8.0        | 1     | 99    | 0.4                |
| 8.5        | 95    | 5     | 0.4                |
| 10.0       | 95    | 5     | 0.4                |

Table S4. MS transitions, MRM parameters (CE: collision energy, DP: declustering potential, CXP: cell exit potential, EP: entrance potential), and internal standards for PFAS analysis.

| Analyte          | Isolation mass | Quantifier mass | CE (V) | DP (V) | CXP (V) | EP (V) | Internal Standard |
|------------------|----------------|-----------------|--------|--------|---------|--------|-------------------|
| PFMOAA           | 179            | 85              | -15    | -30    | -5      | -10    | M-PFBA            |
| PFMOPrA/<br>PMPA | 229            | 85              | -20    | -50    | -5      | -10    | M-PFBA            |
| PFMOBA           | 279            | 85              | -25    | -40    | -5      | -14    | M-PFHxA           |
| HFPO-DA          | 329            | 285             | -15    | -30    | -5      | -10    | M-HFPO-DA         |
| PFOA             | 413            | 369             | -14    | -50    | -6      | -10    | M-PFOA            |
| PFOS             | 499            | 99              | -70    | -120   | -14     | -14    | M-PFOS            |
| M-PFBA           | 217            | 172             | -15    | -40    | -7      | -14    |                   |
| M-PFHxA          | 315            | 270             | -15    | -48    | -12     | -10    |                   |
| M-HFPO-DA        | 332            | 169             | -18    | -30    | -1      | -10    |                   |
| M-PFOA           | 421            | 376             | -14    | -50    | -6      | -10    |                   |
| M-PFOS           | 507            | 99              | -70    | -120   | -14     | -14    |                   |

Table S5. Spiked recoveries of each target analyte and the corresponding LOQ and LODs for each compound. The average, standard deviation and percent relative standard deviation is shown below each analyte. n/a = not available and – is due to contamination

| Sample                  | PFOA   | PFMOAA | PFMOBA | PFMOPrA/<br>PMPA | HFPO-DA | PFOS |
|-------------------------|--------|--------|--------|------------------|---------|------|
| EB_180130               | 36.5%  | 109%   | 140%   | 87%              | 127%    | 113% |
| Chemours_180326         | 108.0% | 50%    | 95%    | 72%              | 115%    | 89%  |
| WOD_170919              | 98%    | 80%    | 130%   | 96%              | 132%    | 96%  |
| LD1_180326              | 80%    | n/a    | 141%   | 157%             | 67%     | 105% |
| MCF_190401              | 76%    | 74%    | 31%    | 101%             | 47%     | 69%  |
| M35_181029              | 90%    | 98%    | 100%   | 104%             | --%     | 54%  |
| Average                 | 81     | 82     | 106    | 102              | 97      | 87   |
| Std dev                 | 25     | 22     | 41     | 28               | 38      | 22   |
| %RSD                    | 30     | 27     | 39     | 28               | 39      | 25   |
| LOQ (pg on column)      | 3      | 4.     | 4      | 4                | 4       | 4    |
| LOQ (pg/g dry sediment) | 3      | 5      | 2      | 9                | 2       | 12   |

Table S6. The environmental concentrations obtained for precision performance. The average and standard deviations are listed below each set of samples (n=2-3). These averages were used as the reported values.

| Sample              | PFMOAA | PFMOPrA/PMPA | PFMOBA | HFPO-DA | PFOA | PFOS |
|---------------------|--------|--------------|--------|---------|------|------|
| FBR_170919 (1)      | <LOQ   | <LOQ         | <LOQ   | 0.2     | 0.1  | 0.7  |
| FBR_170919 (2)      | <LOQ   | <LOQ         | <LOQ   | 0.5     | 0.1  | 0.4  |
| FBR_170919 (3)      | <LOQ   | <LOQ         | <LOQ   | 0.5     | 0.1  | 0.4  |
| Average             | ---    | ---          | ---    | 0.4     | 0.1  | 0.5  |
| Std dev             | ---    | ---          | ---    | 0.2     | 0    | 0.2  |
| Chemours_180326 (1) | 5      | 0.1          | <LOQ   | 2       | 0.4  | 0.4  |
| Chemours_180326 (2) | 4      | <LOQ         | <LOQ   | 2       | 0.4  | <LOQ |
| HB_181029 (1)       | 0.1    | <LOQ         | <LOQ   | 0.9     | 0.1  | 0.9  |
| HB_181029 (2)       | <LOQ   | <LOQ         | <LOQ   | 0.2     | 0.2  | 0.4  |
| HB_181029 (3)       | <LOQ   | <LOQ         | 0.1    | 0.4     | 0.2  | 1    |
| Average             | ---    | ---          | --     | 0.5     | 0.2  | 0.8  |
| Std dev             | ---    | ---          | --     | 0.3     | 0.1  | 0.3  |

Table S7: Full list of PFAS screened for at each sample location along the Cape Fear River. Structures can be found in Figure S2 and two numbers indicate isomers in order of elution from left to right.

| Category                                        | Structure Number | CAS                      | Confidence | Formula (M-1)                                                               | Monoisotopic Mass M-1 (u) | Reference               |
|-------------------------------------------------|------------------|--------------------------|------------|-----------------------------------------------------------------------------|---------------------------|-------------------------|
| <i><sup>a</sup>Perfluorinated Ether Acids</i>   | 1                | 39492-88-1               | 4          | C <sub>4</sub> F <sub>7</sub> O <sub>4</sub>                                | 244.9685                  | Strynar et al., 2015    |
|                                                 | 2                | 39492-89-2               | 4          | C <sub>5</sub> F <sub>9</sub> O <sub>5</sub>                                | 310.9602                  | Strynar et al., 2015    |
|                                                 | 3                | 151772-58-6              | 4          | C <sub>5</sub> F <sub>9</sub> O <sub>4</sub>                                | 294.9653                  | chen et al., 2020       |
|                                                 | 4                | 39492-90-5               | 4          | C <sub>6</sub> F <sub>11</sub> O <sub>6</sub>                               | 376.9519                  | Sun et al. 2016         |
|                                                 | 5                | 39492-91-6               | 4          | C <sub>7</sub> F <sub>13</sub> O <sub>7</sub>                               | 442.9436                  | Roebuck et al., 2020    |
|                                                 | 6                | 801212-59-9              | 4          | C <sub>7</sub> F <sub>13</sub> O <sub>3</sub>                               | 378.964                   | McCord et al., 2018     |
|                                                 | 7                | 69087-46-3               | 4          | C <sub>8</sub> F <sub>13</sub> O <sub>4</sub>                               | 406.9589                  | McCord and Strynar 2019 |
|                                                 | 8                | 113507-82-7              | 4          | C <sub>4</sub> F <sub>9</sub> O <sub>4</sub> S                              | 314.9374                  | Strynar et al., 2015    |
|                                                 | 9                | 29311-67-9               | 4          | C <sub>7</sub> F <sub>13</sub> O <sub>5</sub> S                             | 442.9259                  | Strynar et al., 2015    |
| <i><sup>b</sup>H-Polyfluorinated</i>            | 10               | 801209-99-4              | 4          | C <sub>4</sub> HF <sub>8</sub> O <sub>4</sub> S                             | 296.9468                  | Saleeby et al.,         |
|                                                 | 11               | 2416366-21-5             | 4          | C <sub>6</sub> HF <sub>12</sub> O <sub>4</sub> S                            | 396.9404                  | McCord and Strynar 2019 |
|                                                 | 12               | 749836-20-2              | 3          | C <sub>7</sub> HF <sub>14</sub> O <sub>5</sub> S                            | 462.9321                  | Saleeby et al.,         |
|                                                 | 13               | 773804-62-9              | 4          | C <sub>8</sub> HF <sub>14</sub> O <sub>4</sub>                              | 426.9651                  | McCord and Strynar 2019 |
| <i><sup>c</sup>PerFluoro Ether Multi-Acidic</i> | 14a/b            | 2416366-18-0/852157-01-8 | 4          | C <sub>7</sub> HF <sub>12</sub> O <sub>6</sub> S                            | 440.9302                  | Zhou et al 2007         |
|                                                 | 15               | 2416366-19-1             | 4          | C <sub>7</sub> H <sub>2</sub> F <sub>11</sub> O <sub>7</sub> S              | 438.9346                  | McCord and Strynar 2019 |
|                                                 | 16               | 1235024-21-1             | 4          | C <sub>8</sub> H <sub>1</sub> F <sub>14</sub> O <sub>7</sub> S <sub>1</sub> | 506.922                   | Zhou et al 2007         |
|                                                 | 17               | 1235024-21-1             | 4          | C <sub>5</sub> HF <sub>8</sub> O <sub>6</sub> S                             | 340.9366                  | Takasaki et al 2013     |

a= general formula of CF<sub>3</sub>(CF<sub>2</sub>)<sub>n</sub>(CF<sub>2</sub>O)<sub>m</sub>(R<sub>1</sub>) where R is -SO<sub>3</sub>H or -COOH

b= where one F is replaced with an H

c= general formula of R<sub>1</sub>-(CF<sub>2</sub>)<sub>n</sub>(CF<sub>2</sub>O)<sub>m</sub>-R<sub>2</sub> where R<sub>1</sub> and R<sub>2</sub> are variable acidic groups of -SO<sub>3</sub>H or -COOH



Figure S1. Chemical structures of each targeted PFAS for quantitative analysis. \*Note PFMOPrA and PMPA could not be chromatographically resolved.

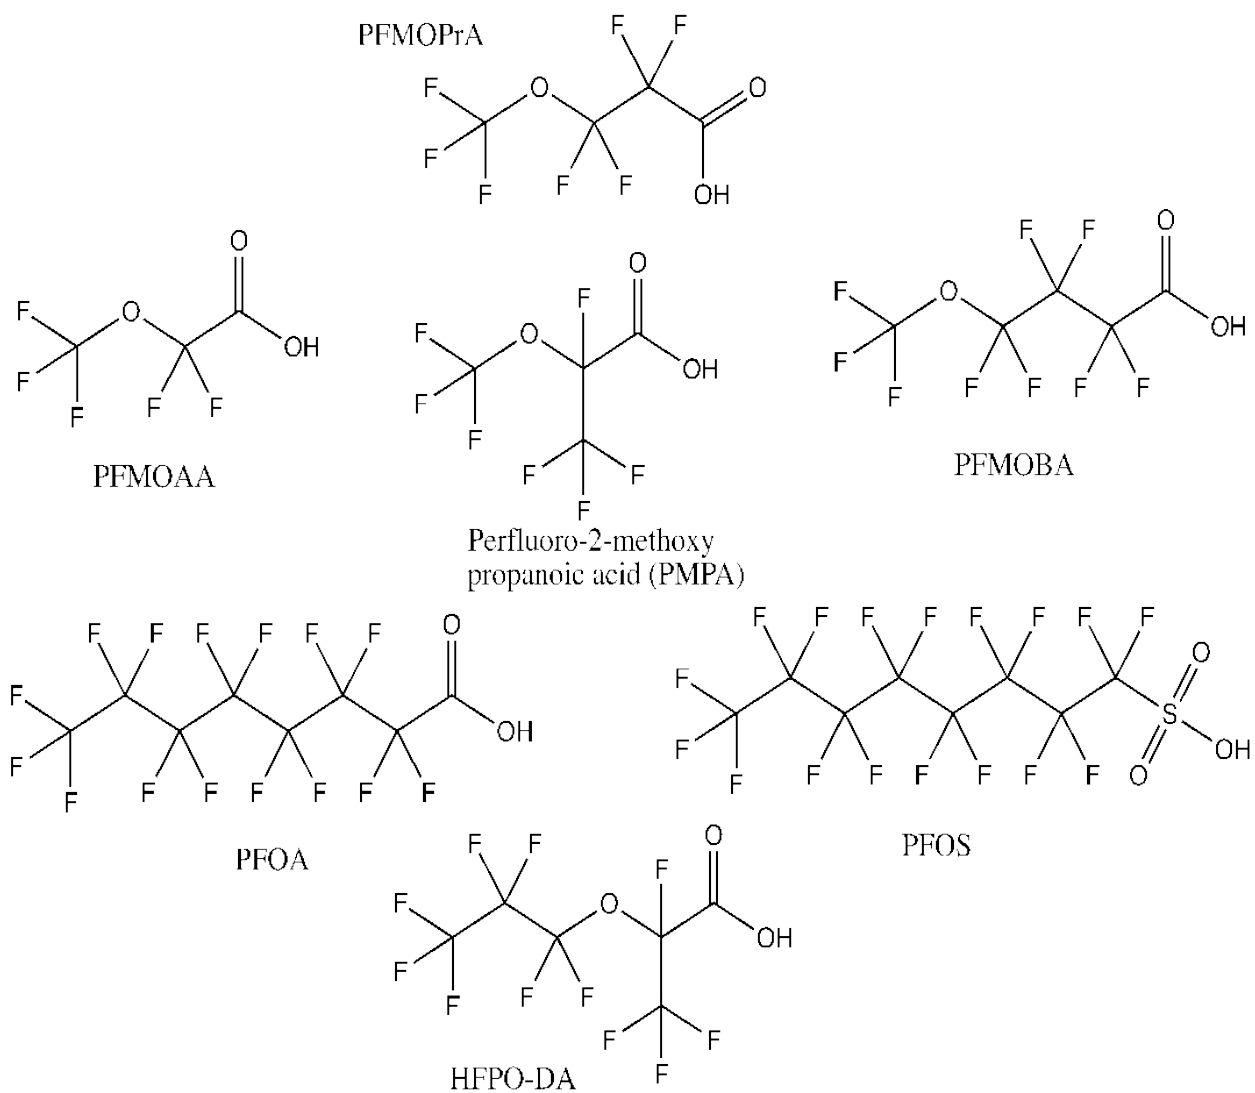

Figure S2: Structures of PFAS screened for in sediment extracts by LC-QTOF. The structures and CAS numbers are based upon previously published information and remain tentative as no authentic standard was available at the time of study.

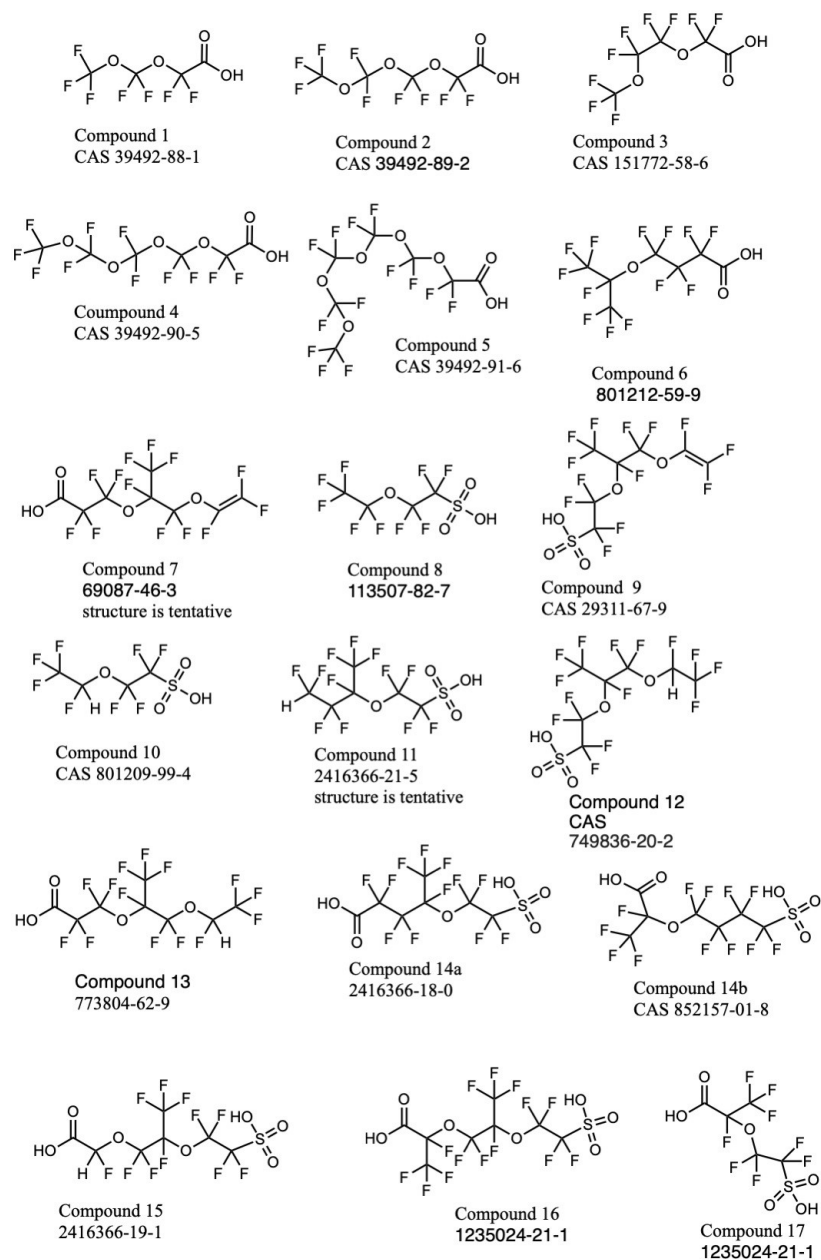

Supplement: d2em00246a1.pdf [file d2em00246a1.pdf]
